# Supplementary material for: Centenarian hippocampus displays high levels of astrocytic metallothioneins
Source: PubMed Central journal article supplement (PMC11320342; doi:10.1111/acel.14201), 2024-05-20
Supplement: ACEL-23-e14201-s001.pdf [file ACEL-23-e14201-s001.pdf]

1  
2**Table 1.** Genes increased in centenarians vs elderly in hippocampus

| Gene symbol     | Gene name                                                 | Fold Change | p-value |
|-----------------|-----------------------------------------------------------|-------------|---------|
| <i>RASSF4</i>   | Ras association (RalGDS/AF-6) domain family member 4      | 2,57        | 0,000   |
| <i>MT1M</i>     | metallothionein 1M                                        | 3,41        | 0,000   |
| <i>ATP13A4</i>  | ATPase type 13A4                                          | 2,36        | 0,000   |
| <i>LRP4</i>     | LDL receptor related protein 4                            | 2,44        | 0,000   |
| <i>LRRC8A</i>   | leucine rich repeat containing 8 family, member A         | 2,28        | 0,000   |
| <i>SLC25A18</i> | solute carrier family 25, member 18                       | 2,21        | 0,000   |
| <i>MT1E</i>     | metallothionein 1E                                        | 4,01        | 0,000   |
| <i>LRP6</i>     | LDL receptor related protein 6                            | 2,02        | 0,000   |
| <i>CHD9</i>     | chromodomain helicase DNA binding protein 9               | 2,46        | 0,000   |
| <i>HEPACAM</i>  | hepatic and glial cell adhesion molecule                  | 2,92        | 0,000   |
| <i>LGI4</i>     | leucine-rich repeat LGI family, member 4                  | 2,72        | 0,000   |
| <i>MT1X</i>     | metallothionein 1X                                        | 4,22        | 0,000   |
| <i>ARHGAP31</i> | Rho GTPase activating protein 31                          | 2,74        | 0,000   |
| <i>MT1F</i>     | metallothionein 1F                                        | 3,1         | 0,001   |
| <i>FXYD1</i>    | FXYD domain containing ion transport regulator 1          | 5,83        | 0,001   |
| <i>PDGFRB</i>   | platelet-derived growth factor receptor, beta polypeptide | 2,58        | 0,001   |
| <i>OPTN</i>     | optineurin                                                | 2,48        | 0,001   |
| <i>METTL7A</i>  | methyltransferase like 7A                                 | 4,71        | 0,001   |
| <i>MT1A</i>     | metallothionein 1A                                        | 2,58        | 0,001   |
| <i>TFCP2</i>    | transcription factor CP2                                  | 2,04        | 0,001   |
| <i>TPCN1</i>    | two pore segment channel 1                                | 2,6         | 0,001   |
| <i>RAPGEF3</i>  | Rap guanine nucleotide exchange factor 3                  | 2,27        | 0,001   |
| <i>ADCY2</i>    | adenylate cyclase 2                                       | 2,93        | 0,002   |
| <i>GPR75</i>    | G protein-coupled receptor 75                             | 2,62        | 0,002   |
| <i>CTDSP1</i>   | CTD small phosphatase 1                                   | 3,08        | 0,002   |
| <i>GPR37L1</i>  | G protein-coupled receptor 37 like 1                      | 2,52        | 0,002   |
| <i>SLC2A5</i>   | solute carrier family 2, member 5                         | 2,65        | 0,002   |
| <i>SLC39A12</i> | solute carrier family 39, member 12                       | 2,65        | 0,002   |
| <i>ADGRG1</i>   | adhesion G protein-coupled receptor G1                    | 3,61        | 0,002   |
| <i>CNTFR</i>    | ciliary neurotrophic factor receptor                      | 3,18        | 0,002   |
| <i>HTRA1</i>    | HtrA serine peptidase 1                                   | 3,45        | 0,002   |
| <i>P3H2</i>     | prolyl 3-hydroxylase 2                                    | 4,13        | 0,002   |
| <i>ROCK1</i>    | Rho-associated, coiled-coil containing protein kinase 1   | 2,03        | 0,002   |
| <i>PHYHD1</i>   | phytanoyl-CoA dioxygenase domain containing 1             | 2,02        | 0,002   |
| <i>TNS2</i>     | tensin 2                                                  | 2,01        | 0,002   |
| <i>MED12</i>    | mediator complex subunit 12                               | 2,84        | 0,003   |
| <i>ALMS1</i>    | Alstrom syndrome protein 1                                | 2,21        | 0,003   |
| <i>USP1</i>     | ubiquitin specific peptidase 1                            | 2,17        | 0,003   |
| <i>DCHS2</i>    | dachsous cadherin-related 2                               | 2,06        | 0,003   |
| <i>CABLES1</i>  | Cdk5 and Abl enzyme substrate 1                           | 2,89        | 0,003   |
| <i>CLASP2</i>   | cytoplasmic linker associated protein 2                   | 2,4         | 0,003   |
| <i>OPHN1</i>    | oligophrenin 1                                            | 2,05        | 0,004   |
| <i>SNTA1</i>    | syntrophin, alpha 1                                       | 2,11        | 0,004   |
| <i>ACACB</i>    | acetyl-CoA carboxylase beta                               | 2,81        | 0,004   |
| <i>MERTK</i>    | MER proto-oncogene, tyrosine kinase                       | 2,71        | 0,004   |
| <i>MT1G</i>     | metallothionein 1G                                        | 2,00        | 0,004   |

|                 |                                                                          |      |       |
|-----------------|--------------------------------------------------------------------------|------|-------|
| <i>TP53BP2</i>  | tumor protein p53 binding protein 2                                      | 3,26 | 0,005 |
| <i>MAPRE1</i>   | microtubule-associated protein, RP/EB family, member 1                   | 2,17 | 0,005 |
| <i>NPL</i>      | N-acetylneuraminatase pyruvate lyase                                     | 3,22 | 0,005 |
| <i>TMEM176A</i> | transmembrane protein 176A                                               | 2,14 | 0,005 |
| <i>TCF7L2</i>   | transcription factor 7-like 2 (T-cell specific, HMG-box)                 | 2,52 | 0,006 |
| <i>IGFBP7</i>   | insulin like growth factor binding protein 7                             | 3,46 | 0,006 |
| <i>PADI2</i>    | peptidyl arginine deiminase, type II                                     | 2,78 | 0,006 |
| <i>HOMEZ</i>    | homeobox and leucine zipper encoding                                     | 2,15 | 0,006 |
| <i>SLC14A1</i>  | solute carrier family 14, member 1                                       | 5,00 | 0,006 |
| <i>PAPLN</i>    | papilin, proteoglycan-like sulfated glycoprotein                         | 3,49 | 0,006 |
| <i>PMS1</i>     | PMS1 homolog 1, mismatch repair system component                         | 2,07 | 0,006 |
| <i>ADIRF</i>    | adipogenesis regulatory factor                                           | 2,71 | 0,006 |
| <i>PSD2</i>     | pleckstrin and Sec7 domain containing 2                                  | 2,02 | 0,006 |
| <i>GLUL</i>     | glutamate-ammonia ligase                                                 | 2,16 | 0,007 |
| <i>MGLL</i>     | monoglyceride lipase                                                     | 2,71 | 0,007 |
| <i>PRDX6</i>    | peroxiredoxin 6                                                          | 2,32 | 0,007 |
| <i>TYRO3</i>    | TYRO3 protein tyrosine kinase                                            | 2,28 | 0,007 |
| <i>KCNN3</i>    | potassium channel, subfamily N alpha, member 3                           | 3,27 | 0,007 |
| <i>STON2</i>    | stonin 2                                                                 | 2,51 | 0,007 |
| <i>PLXNB3</i>   | plexin B3                                                                | 2,33 | 0,008 |
| <i>MTIL</i>     | metallothionein 1L                                                       | 2,36 | 0,008 |
| <i>PNRC1</i>    | proline-rich nuclear receptor coactivator 1                              | 2,38 | 0,008 |
| <i>CYP4V2</i>   | cytochrome P450, family 4, subfamily V, polypeptide 2                    | 2,2  | 0,009 |
| <i>GJAI</i>     | gap junction protein alpha 1                                             | 3,34 | 0,009 |
| <i>EFHD1</i>    | EF-hand domain family member D1                                          | 2,11 | 0,009 |
| <i>MT1B</i>     | metallothionein 1B                                                       | 2,22 | 0,011 |
| <i>CPM</i>      | carboxypeptidase M                                                       | 2,13 | 0,011 |
| <i>SORL1</i>    | sortilin related receptor 1                                              | 2,35 | 0,011 |
| <i>FAT1</i>     | FAT atypical cadherin 1                                                  | 2,46 | 0,011 |
| <i>STOM</i>     | stomatin                                                                 | 2,06 | 0,011 |
| <i>LIMCH1</i>   | LIM and calponin homology domains 1                                      | 2,03 | 0,011 |
| <i>SEC14L1</i>  | SEC14-like lipid binding 1                                               | 2,69 | 0,011 |
| <i>WASF2</i>    | WAS protein family, member 2                                             | 2,29 | 0,011 |
| <i>SEPN1</i>    | selenoprotein N, 1                                                       | 2,13 | 0,012 |
| <i>CAPN2</i>    | calpain 2, (m/II) large subunit                                          | 2,14 | 0,012 |
| <i>ARHGEF4</i>  | Rho guanine nucleotide exchange factor 4                                 | 2,19 | 0,012 |
| <i>PFKFB3</i>   | 6-phosphofructo-2-kinase/fructose-2,6-biphosphatase 3                    | 3,06 | 0,012 |
| <i>RGCC</i>     | regulator of cell cycle                                                  | 2,3  | 0,012 |
| <i>ZNRF3</i>    | zinc and ring finger 3                                                   | 2,27 | 0,013 |
| <i>TMEM259</i>  | transmembrane protein 259                                                | 2,5  | 0,013 |
| <i>WIF1</i>     | WNT inhibitory factor 1                                                  | 2,64 | 0,013 |
| <i>TPD52L1</i>  | tumor protein D52-like 1                                                 | 2,64 | 0,013 |
| <i>FERMT2</i>   | fermitin family member 2                                                 | 2,54 | 0,013 |
| <i>AMOT</i>     | angiominin                                                               | 2,48 | 0,013 |
| <i>PREX1</i>    | phosphatidylinositol-3,4,5-trisphosphate-dependent Rac exchange factor 1 | 2,29 | 0,013 |
| <i>HSDL2</i>    | hydroxysteroid dehydrogenase like 2                                      | 2,49 | 0,014 |
| <i>CHST11</i>   | carbohydrate sulfotransferase 11                                         | 2,22 | 0,014 |
| <i>HEPN1</i>    | hepatocellular carcinoma, down-regulated 1                               | 2,74 | 0,014 |

|                     |                                                                          |      |       |
|---------------------|--------------------------------------------------------------------------|------|-------|
| <i>PTCH1</i>        | patched 1                                                                | 2,37 | 0,014 |
| <i>MDM4</i>         | MDM4, p53 regulator                                                      | 2,14 | 0,015 |
| <i>KLF10</i>        | Kruppel-like factor 10                                                   | 2,12 | 0,015 |
| <i>PAX6</i>         | paired box 6                                                             | 3,02 | 0,015 |
| <i>LOC101929372</i> | uncharacterized LOC101929372                                             | 2,69 | 0,015 |
| <i>CHPT1</i>        | choline phosphotransferase 1                                             | 2,85 | 0,016 |
| <i>AHCYL1</i>       | adenosylhomocysteinase like 1                                            | 2,44 | 0,016 |
| <i>PPP1R1B</i>      | protein phosphatase 1, regulatory subunit 1B                             | 3,01 | 0,017 |
| <i>SHANK1</i>       | SH3 and multiple ankyrin repeat domains 1                                | 2,17 | 0,017 |
| <i>TRPS1</i>        | trichorhinophalangeal syndrome I                                         | 2,22 | 0,017 |
| <i>ALG6</i>         | ALG6, alpha-1,3-glucosyltransferase                                      | 2,63 | 0,017 |
| <i>TAF15</i>        | TATA-box binding protein associated factor 15                            | 2,36 | 0,018 |
| <i>GPRC5B</i>       | G protein-coupled receptor, class C, group 5, member B                   | 2,78 | 0,018 |
| <i>GRAMD3</i>       | GRAM domain containing 3                                                 | 2,47 | 0,018 |
| <i>ENG</i>          | endoglin                                                                 | 2,46 | 0,018 |
| <i>NEK11</i>        | NIMA-related kinase 11                                                   | 2,00 | 0,019 |
| <i>CTSH</i>         | cathepsin H                                                              | 2,94 | 0,019 |
| <i>GSTM5</i>        | glutathione S-transferase mu 5                                           | 2,83 | 0,021 |
| <i>DOCK7</i>        | dedicator of cytokinesis 7                                               | 2,1  | 0,021 |
| <i>PROX1</i>        | prospero homeobox 1                                                      | 2,99 | 0,021 |
| <i>TBX3</i>         | T-box 3                                                                  | 2,84 | 0,021 |
| <i>PITPNC1</i>      | phosphatidylinositol transfer protein, cytoplasmic 1                     | 2,3  | 0,021 |
| <i>GOLIM4</i>       | golgi integral membrane protein 4                                        | 2,58 | 0,021 |
| <i>SLC16A1</i>      | solute carrier family 16, member 1                                       | 2,51 | 0,021 |
| <i>XPNPEP3</i>      | X-prolyl aminopeptidase 3, mitochondrial                                 | 2,06 | 0,022 |
| <i>KCNJ10</i>       | potassium channel, inwardly rectifying subfamily J, member 10            | 2,69 | 0,022 |
| <i>GYS1</i>         | glycogen synthase 1                                                      | 2,05 | 0,022 |
| <i>ATP1B2</i>       | ATPase, Na <sup>+</sup> /K <sup>+</sup> transporting, beta 2 polypeptide | 3,15 | 0,022 |
| <i>ETNPPL</i>       | ethanolamine-phosphate phospho-lyase                                     | 2,33 | 0,023 |
| <i>HBA1</i>         | hemoglobin, alpha 1                                                      | 3,98 | 0,023 |
| <i>ARHGAP24</i>     | Rho GTPase activating protein 24                                         | 2,04 | 0,023 |
| <i>PDK4</i>         | pyruvate dehydrogenase kinase, isozyme 4                                 | 3,8  | 0,023 |
| <i>FAM198B</i>      | family with sequence similarity 198, member B                            | 2,86 | 0,023 |
| <i>STAT3</i>        | signal transducer and activator of transcription 3                       | 2,07 | 0,023 |
| <i>MRAS</i>         | muscle RAS oncogene homolog                                              | 2,02 | 0,024 |
| <i>EZR</i>          | ezrin                                                                    | 3,00 | 0,024 |
| <i>ZNF462</i>       | zinc finger protein 462                                                  | 2,02 | 0,024 |
| <i>RFTN2</i>        | rafflin family member 2                                                  | 2,27 | 0,025 |
| <i>PECAMI</i>       | platelet/endothelial cell adhesion molecule 1                            | 2,22 | 0,025 |
| <i>GNAI2</i>        | guanine nucleotide binding protein alpha 12                              | 2,1  | 0,025 |
| <i>CLDN5</i>        | claudin 5                                                                | 3,17 | 0,026 |
| <i>ING3</i>         | inhibitor of growth family member 3                                      | 2,29 | 0,026 |
| <i>TXNIP</i>        | thioredoxin interacting protein                                          | 2,46 | 0,026 |
| <i>HRSP12</i>       | heat-responsive protein 12                                               | 2,42 | 0,027 |
| <i>NPAS3</i>        | neuronal PAS domain protein 3                                            | 2,00 | 0,027 |
| <i>GIMAP7</i>       | GTPase, IMAP family member 7                                             | 2,06 | 0,028 |
| <i>TNKS</i>         | tankyrase, TRF1-interacting ankyrin-related ADP-ribose polymerase        | 2,18 | 0,028 |
| <i>PARP4</i>        | poly(ADP-ribose) polymerase family member 4                              | 2,02 | 0,031 |

|                 |                                                                                     |      |       |
|-----------------|-------------------------------------------------------------------------------------|------|-------|
| <i>HBA2</i>     | hemoglobin, alpha 2                                                                 | 2,52 | 0,031 |
| <i>KCNJ16</i>   | potassium channel, inwardly rectifying subfamily J, member 16                       | 2,03 | 0,032 |
| <i>NFKBIA</i>   | nuclear factor of kappa light polypeptide gene enhancer in B-cells inhibitor, alpha | 3,08 | 0,033 |
| <i>FAXDC2</i>   | fatty acid hydroxylase domain containing 2                                          | 2,88 | 0,033 |
| <i>BMP2K</i>    | BMP2 inducible kinase                                                               | 2,13 | 0,033 |
| <i>RANBP3L</i>  | RAN binding protein 3-like                                                          | 4,23 | 0,034 |
| <i>BAMBI</i>    | BMP and activin membrane-bound inhibitor                                            | 2,33 | 0,034 |
| <i>S100A1</i>   | S100 calcium binding protein A1                                                     | 2,26 | 0,034 |
| <i>EPS15</i>    | epidermal growth factor receptor pathway substrate 15                               | 2,61 | 0,035 |
| <i>GRAMD1C</i>  | GRAM domain containing 1C                                                           | 2,12 | 0,035 |
| <i>POLR2G</i>   | polymerase II polypeptide G                                                         | 2,06 | 0,035 |
| <i>AAMDC</i>    | adipogenesis associated, Mth938 domain containing                                   | 2,45 | 0,036 |
| <i>MLXIP</i>    | MLX interacting protein                                                             | 2,35 | 0,036 |
| <i>ARRDC3</i>   | arrestin domain containing 3                                                        | 2,25 | 0,036 |
| <i>MTSS1L</i>   | metastasis suppressor 1-like                                                        | 2,05 | 0,036 |
| <i>RPS6KA2</i>  | ribosomal protein S6 kinase, 90kDa, polypeptide 2                                   | 2,11 | 0,036 |
| <i>MECOM</i>    | MDS1 and EVI1 complex locus                                                         | 2,01 | 0,037 |
| <i>EPAS1</i>    | endothelial PAS domain protein 1                                                    | 3,33 | 0,037 |
| <i>CCNB1IP1</i> | cyclin B1 interacting protein 1                                                     | 2,7  | 0,038 |
| <i>ATP11C</i>   | ATPase, class VI, type 11C                                                          | 2,45 | 0,038 |
| <i>NT5DC2</i>   | 5-nucleotidase domain containing 2                                                  | 2,44 | 0,038 |
| <i>EPHX1</i>    | epoxide hydrolase 1, microsomal                                                     | 2,51 | 0,039 |
| <i>AGT</i>      | angiotensinogen                                                                     | 2,29 | 0,041 |
| <i>MT3</i>      | metallothionein 3                                                                   | 5,69 | 0,041 |
| <i>WFS1</i>     | Wolfram syndrome 1 (wolframin)                                                      | 2,06 | 0,041 |
| <i>ITGB4</i>    | integrin beta 4                                                                     | 2,29 | 0,041 |
| <i>PCDHG</i>    | protocadherin gamma                                                                 | 2,28 | 0,041 |
| <i>FAM177B</i>  | family with sequence similarity 177, member B                                       | 2,43 | 0,041 |
| <i>NOTCH2NL</i> | notch 2 N-terminal like                                                             | 3,6  | 0,041 |
| <i>SDC4</i>     | syndecan 4                                                                          | 2,31 | 0,041 |
| <i>NUDT6</i>    | nudix hydrolase 6                                                                   | 2,64 | 0,042 |
| <i>PLPP3</i>    | phospholipid phosphatase 3                                                          | 3,26 | 0,043 |
| <i>PODXL</i>    | podocalyxin-like                                                                    | 2,02 | 0,043 |
| <i>ZFP36L1</i>  | ZFP36 ring finger protein-like 1                                                    | 3,5  | 0,044 |
| <i>CD58</i>     | CD58 molecule                                                                       | 2,71 | 0,044 |
| <i>SFMBT2</i>   | Scm-like with four mbt domains 2                                                    | 2,24 | 0,045 |
| <i>CST3</i>     | cystatin C                                                                          | 2,15 | 0,045 |
| <i>PLEKHG1</i>  | pleckstrin homology domain containing, family G member 1                            | 2,16 | 0,045 |
| <i>PYGL</i>     | glycogen phosphorylase L                                                            | 2,22 | 0,045 |
| <i>SLC16A1</i>  | solute carrier family 16, member 1                                                  | 2,06 | 0,046 |
| <i>RUBCN</i>    | RUN domain and cysteine-rich domain containing, Beclin 1-interacting protein        | 2,65 | 0,046 |
| <i>LHX2</i>     | LIM homeobox 2                                                                      | 2,42 | 0,047 |
| <i>RBBP8</i>    | retinoblastoma binding protein 8                                                    | 2,05 | 0,047 |
| <i>SAFB2</i>    | scaffold attachment factor B2                                                       | 2,08 | 0,047 |
| <i>BID</i>      | BH3 interacting domain death agonist                                                | 2,1  | 0,047 |
| <i>SLC2A1</i>   | solute carrier family 2, member 1                                                   | 4,03 | 0,047 |
| <i>LHFP</i>     | lipoma HMGIC fusion partner                                                         | 2,25 | 0,048 |
| <i>GMNN</i>     | geminin DNA replication inhibitor                                                   | 2,05 | 0,049 |

3  
4**Table 2.** Genes decreased in centenarians vs elderly in hippocampus

| Gene symbol     | Gene name                                                                  | Fold Change | p-value |
|-----------------|----------------------------------------------------------------------------|-------------|---------|
| <i>POGZ</i>     | pogo transposable element derived with ZNF domain                          | -2,58       | 0,001   |
| <i>CCBE1</i>    | collagen and calcium binding EGF domains 1                                 | -2,31       | 0,001   |
| <i>TDO2</i>     | tryptophan 2,3-dioxygenase                                                 | -2,06       | 0,001   |
| <i>PSMD13</i>   | proteasome 26S subunit, non-ATPase 13                                      | -2,8        | 0,002   |
| <i>SPINK1</i>   | serine peptidase inhibitor, Kazal type 1                                   | -2,04       | 0,002   |
| <i>PDS5B</i>    | PDS5 cohesin associated factor B                                           | -2,11       | 0,003   |
| <i>SLC38A6</i>  | solute carrier family 38, member 6                                         | -3,39       | 0,003   |
| <i>TRMT6</i>    | tRNA methyltransferase 6                                                   | -2,16       | 0,003   |
| <i>CD274</i>    | CD274 molecule                                                             | -2,79       | 0,004   |
| <i>TRPC5</i>    | transient receptor potential cation channel, subfamily C, member 5         | -2,27       | 0,005   |
| <i>AREG</i>     | amphiregulin                                                               | -2,43       | 0,005   |
| <i>CHN2</i>     | chimerin 2                                                                 | -2,02       | 0,005   |
| <i>ABCD2</i>    | ATP binding cassette subfamily D, member 2                                 | -2,52       | 0,005   |
| <i>ARPP21</i>   | cAMP regulated phosphoprotein 21                                           | -2,22       | 0,006   |
| <i>C3orf49</i>  | chromosome 3 open reading frame 49                                         | -2,47       | 0,006   |
| <i>PANK1</i>    | pantothenate kinase 1                                                      | -2,04       | 0,007   |
| <i>SHCBP1</i>   | SHC SH2-domain binding protein 1                                           | -2,42       | 0,008   |
| <i>PRG1</i>     | p53-responsive gene 1                                                      | -2,08       | 0,009   |
| <i>CLU10S</i>   | chronic lymphocytic leukemia up-regulated 1 opposite strand                | -2,05       | 0,009   |
| <i>HCP5</i>     | HLA complex P5                                                             | -2,03       | 0,011   |
| <i>UTS2</i>     | urotensin 2                                                                | -2,01       | 0,011   |
| <i>TRPV2</i>    | transient receptor potential cation channel, subfamily V, member 2         | -2,08       | 0,011   |
| <i>ADAT2</i>    | adenosine deaminase, tRNA-specific 2                                       | -2,08       | 0,011   |
| <i>DEFB106A</i> | defensin, beta 106A                                                        | -2,1        | 0,011   |
| <i>GBP3</i>     | guanylate Binding Protein 3                                                | -2,29       | 0,011   |
| <i>PLCZ1</i>    | phospholipase C, zeta 1                                                    | -2,12       | 0,011   |
| <i>MAP1B</i>    | microtubule associated protein 1B                                          | -2,14       | 0,012   |
| <i>OR4D1</i>    | olfactory receptor, family 4, subfamily D, member 1                        | -2,13       | 0,013   |
| <i>ZNF442</i>   | zinc finger protein 442                                                    | -2,09       | 0,013   |
| <i>PKP4</i>     | plakophilin 4                                                              | -2,02       | 0,017   |
| <i>PTPN20</i>   | protein tyrosine phosphatase, non-receptor type 20                         | -2,15       | 0,017   |
| <i>CLUL1</i>    | clusterin-like 1                                                           | -2,64       | 0,017   |
| <i>F11</i>      | coagulation factor XI                                                      | -2,24       | 0,017   |
| <i>PCDH11X</i>  | protocadherin 11 X-linked                                                  | -2,11       | 0,017   |
| <i>RPIA</i>     | ribose 5-phosphate isomerase A                                             | -2,00       | 0,018   |
| <i>SLC12A5</i>  | solute carrier family 12, member 5                                         | -2,12       | 0,018   |
| <i>KLHL11</i>   | kelch-like family member 11                                                | -2,06       | 0,018   |
| <i>TBPL1</i>    | TBP-like 1                                                                 | -2,69       | 0,019   |
| <i>CHI3L2</i>   | chitinase 3-like 2                                                         | -3,35       | 0,020   |
| <i>FAM19A1</i>  | family with sequence similarity 19 (chemokine (C-C motif)-like), member A1 | -2,17       | 0,021   |
| <i>POLR2M</i>   | RNA polymerase II subunit M                                                | -2,12       | 0,021   |
| <i>OR4C11</i>   | olfactory receptor, family 4, subfamily C, member 11                       | -2,35       | 0,022   |
| <i>PROS1</i>    | protein S                                                                  | -2,24       | 0,023   |
| <i>OR51G1</i>   | olfactory receptor, family 51, subfamily G, member 1                       | -2,36       | 0,024   |
| <i>DEFB126</i>  | defensin, beta 126                                                         | -2,01       | 0,024   |

|                  |                                                                    |       |       |
|------------------|--------------------------------------------------------------------|-------|-------|
| <i>TRPC7</i>     | transient receptor potential cation channel, subfamily C, member 7 | -2,04 | 0,024 |
| <i>HELB</i>      | helicase (DNA) B                                                   | -2,04 | 0,027 |
| <i>PFDN4</i>     | prefoldin subunit 4                                                | -2,38 | 0,029 |
| <i>RNF17</i>     | ring finger protein 17                                             | -2,45 | 0,031 |
| <i>EDDM3A</i>    | epididymal protein 3A                                              | -2,22 | 0,031 |
| <i>TNNC1</i>     | troponin C type 1                                                  | -2,14 | 0,031 |
| <i>PRKG2</i>     | protein kinase, cGMP-dependent, type II                            | -2,03 | 0,031 |
| <i>TSPAN13</i>   | tetraspanin 13                                                     | -2,76 | 0,035 |
| <i>FAM151B</i>   | family with sequence similarity 151 member B                       | -2,83 | 0,036 |
| <i>LRRC28</i>    | leucine rich repeat containing 28                                  | -2,5  | 0,037 |
| <i>LOC643802</i> | u3 small nucleolar ribonucleoprotein protein MPP10-like            | -2,01 | 0,038 |
| <i>FRG1BP</i>    | FSHD region gene 1 family member B                                 | -2,62 | 0,041 |
| <i>CLC</i>       | Charcot-Leyden crystal galectin                                    | -2,02 | 0,042 |
| <i>TRPC4</i>     | transient receptor potential cation channel, subfamily C, member 4 | -2,1  | 0,043 |
| <i>LAMA1</i>     | laminin, alpha 1                                                   | -2,07 | 0,043 |
| <i>GPRASP2</i>   | G protein-coupled receptor associated sorting protein 2            | -2,05 | 0,043 |
| <i>ZNF705G</i>   | zinc finger protein 705G                                           | -2,45 | 0,043 |
| <i>SEMA3E</i>    | sema domain, immunoglobulin domain, secreted 3E                    | -2,34 | 0,044 |
| <i>SULT4A1</i>   | sulfotransferase family 4A member 1                                | -2,1  | 0,045 |
| <i>PATE2</i>     | prostate and testis expressed 2                                    | -2,16 | 0,046 |

5  
6

**Table 3.** Genes increased in centenarians vs young individuals in hippocampus

| Gene symbol         | Gene name                                                                | Fold Change | p-value  |
|---------------------|--------------------------------------------------------------------------|-------------|----------|
| <i>FASTKD3</i>      | FAST kinase domains 3                                                    | 2,449       | 5,33E-05 |
| <i>ANKRD18B</i>     | ankyrin repeat domain 18B                                                | 4,537       | 0,000    |
| <i>RASGEF1B</i>     | RasGEF domain family member 1B                                           | 2,770       | 0,000    |
| <i>CCDC84</i>       | coiled-coil domain containing 84                                         | 4,071       | 0,000    |
| <i>LOC101929372</i> | uncharacterized LOC101929372                                             | 3,027       | 0,001    |
| <i>FAM177B</i>      | family with sequence similarity 177, member B                            | 3,687       | 0,001    |
| <i>CXorf57</i>      | chromosome X open reading frame 57                                       | 2,254       | 0,002    |
| <i>RASSF4</i>       | Ras association domain family member 4                                   | 2,174       | 0,002    |
| <i>PLXNB3</i>       | plexin B3                                                                | 3,689       | 0,002    |
| <i>GPR37L1</i>      | G protein-coupled receptor 37 like 1                                     | 2,838       | 0,003    |
| <i>PADI2</i>        | peptidyl arginine deiminase, type II                                     | 4,019       | 0,003    |
| <i>LRRC1</i>        | leucine rich repeat containing 1                                         | 2,115       | 0,003    |
| <i>PREX1</i>        | phosphatidylinositol-3,4,5-trisphosphate-dependent Rac exchange factor 1 | 3,611       | 0,004    |
| <i>SLC48A1</i>      | solute carrier family 48 (heme transporter), member 1                    | 2,001       | 0,004    |
| <i>CHI3L1</i>       | chitinase 3-like 1                                                       | 3,116       | 0,004    |
| <i>CPB2</i>         | carboxypeptidase B2                                                      | 2,256       | 0,004    |
| <i>ARAP2</i>        | ArfGAP with RhoGAP domain, ankyrin repeat and PH domain 2                | 2,633       | 0,004    |
| <i>SLC25A18</i>     | solute carrier family 25, member 18                                      | 2,107       | 0,005    |
| <i>GPRC5B</i>       | G protein-coupled receptor, class C, group 5, member B                   | 3,417       | 0,005    |
| <i>LRIG1</i>        | leucine rich repeats and immunoglobulin like domains 1                   | 2,598       | 0,005    |
| <i>HEPACAM</i>      | hepatic and glial cell adhesion molecule                                 | 3,055       | 0,005    |
| <i>KCNJ16</i>       | potassium channel, inwardly rectifying subfamily J, member 16            | 2,827       | 0,007    |
| <i>ADGRG1</i>       | adhesion G protein-coupled receptor G1                                   | 3,652       | 0,008    |
| <i>TPD52L1</i>      | tumor protein D52-like 1                                                 | 3,906       | 0,008    |
| <i>SLC35B2</i>      | solute carrier family 35, member B2                                      | 2,149       | 0,009    |
| <i>CA1</i>          | carbonic anhydrase I                                                     | 2,364       | 0,009    |
| <i>SLC2A5</i>       | solute carrier family 2, member 5                                        | 2,787       | 0,009    |
| <i>C17orf62</i>     | chromosome 17 open reading frame 62                                      | 2,708       | 0,009    |
| <i>MAOB</i>         | monoamine oxidase B                                                      | 2,321       | 0,011    |
| <i>ADCY2</i>        | adenylate cyclase 2                                                      | 2,626       | 0,011    |
| <i>GPR75</i>        | G protein-coupled receptor 75                                            | 2,438       | 0,011    |
| <i>CHD9</i>         | chromodomain helicase DNA binding protein 9                              | 2,304       | 0,011    |
| <i>PHYHD1</i>       | phytanoyl-CoA dioxygenase domain containing 1                            | 2,151       | 0,011    |
| <i>FCGR3B</i>       | Fc fragment of IgG, low affinity IIIb                                    | 3,156       | 0,011    |
| <i>ZGRF1</i>        | zinc finger, GRF-type containing 1                                       | 2,339       | 0,011    |
| <i>RGS12</i>        | regulator of G-protein signaling 12                                      | 2,540       | 0,012    |
| <i>CYP2R1</i>       | cytochrome P450, family 2, subfamily R, polypeptide 1                    | 2,562       | 0,012    |
| <i>NPL</i>          | N-acetylneuraminase pyruvate lyase                                       | 3,879       | 0,012    |
| <i>RARRES3</i>      | retinoic acid receptor responder 3                                       | 3,551       | 0,014    |
| <i>HHATL</i>        | hedgehog acyltransferase-like                                            | 2,416       | 0,014    |
| <i>LGI4</i>         | leucine-rich repeat LGI family, member 4                                 | 3,816       | 0,014    |
| <i>TRIM9</i>        | tripartite motif containing 9                                            | 2,351       | 0,015    |
| <i>HTRA1</i>        | HtrA serine peptidase 1                                                  | 3,371       | 0,015    |
| <i>AK1</i>          | adenylate kinase 1                                                       | 2,217       | 0,015    |
| <i>P3H2</i>         | prolyl 3-hydroxylase 2                                                   | 2,798       | 0,015    |

|                     |                                                                                                 |       |       |
|---------------------|-------------------------------------------------------------------------------------------------|-------|-------|
| <i>SPARCL1</i>      | SPARC like 1                                                                                    | 2,064 | 0,015 |
| <i>IGSF11</i>       | immunoglobulin superfamily, member 11                                                           | 2,307 | 0,016 |
| <i>GRIA4</i>        | glutamate receptor, ionotropic, AMPA 4                                                          | 4,702 | 0,016 |
| <i>PCBP4</i>        | poly(rC) binding protein 4                                                                      | 2,061 | 0,016 |
| <i>RABGEF1</i>      | RAB guanine nucleotide exchange factor 1                                                        | 2,206 | 0,017 |
| <i>SORL1</i>        | sortilin-related receptor, L(DLR class) A repeats containing                                    | 2,484 | 0,017 |
| <i>GIMAP7</i>       | GTPase, IMAP family member 7                                                                    | 2,343 | 0,017 |
| <i>ATF6B</i>        | activating transcription factor 6 beta                                                          | 2,165 | 0,018 |
| <i>SERPINB9</i>     | serpin peptidase inhibitor, member 9                                                            | 2,057 | 0,018 |
| <i>CAPN2</i>        | calpain 2                                                                                       | 2,232 | 0,018 |
| <i>KATNIP</i>       | katanin interacting protein                                                                     | 2,665 | 0,019 |
| <i>TFRC</i>         | transferrin receptor                                                                            | 2,305 | 0,021 |
| <i>ITPKB</i>        | inositol-trisphosphate 3-kinase B                                                               | 2,223 | 0,021 |
| <i>METTL7A</i>      | methyltransferase like 7A                                                                       | 4,445 | 0,021 |
| <i>RRAGC</i>        | Ras related GTP binding C                                                                       | 3,011 | 0,021 |
| <i>KLHL32</i>       | kelch-like family member 32                                                                     | 2,137 | 0,021 |
| <i>ZDHHC11B</i>     | zinc finger, DHHC-type containing 11B                                                           | 4,607 | 0,021 |
| <i>CP</i>           | ceruloplasmin                                                                                   | 3,321 | 0,021 |
| <i>LIFR</i>         | leukemia inhibitory factor receptor alpha                                                       | 2,032 | 0,021 |
| <i>EFEMP1</i>       | EGF containing fibulin-like extracellular matrix protein 1                                      | 3,777 | 0,021 |
| <i>TYRO3</i>        | TYRO3 protein tyrosine kinase                                                                   | 2,200 | 0,021 |
| <i>ZFHX4</i>        | zinc finger homeobox 4                                                                          | 2,158 | 0,021 |
| <i>ART3</i>         | ADP-ribosyltransferase 3                                                                        | 2,441 | 0,022 |
| <i>MT1F</i>         | metallothionein 1F                                                                              | 3,210 | 0,022 |
| <i>NPC1</i>         | Niemann-Pick disease, type C1                                                                   | 3,323 | 0,023 |
| <i>KCNN3</i>        | potassium channel, calcium activated intermediate/small conductance subfamily N alpha, member 3 | 3,254 | 0,023 |
| <i>KCNJ10</i>       | potassium channel, inwardly rectifying subfamily J, member 10                                   | 3,252 | 0,023 |
| <i>C7orf49</i>      | chromosome 7 open reading frame 49                                                              | 2,575 | 0,024 |
| <i>APLNR</i>        | apelin receptor                                                                                 | 3,334 | 0,024 |
| <i>LGI3</i>         | leucine-rich repeat LGI family, member 3                                                        | 2,881 | 0,024 |
| <i>MTUS1</i>        | microtubule associated tumor suppressor 1                                                       | 2,017 | 0,025 |
| <i>TP53BP2</i>      | tumor protein p53 binding protein 2                                                             | 3,183 | 0,026 |
| <i>IGFBP7</i>       | insulin like growth factor binding protein 7                                                    | 4,001 | 0,026 |
| <i>PFKFB3</i>       | 6-phosphofructo-2-kinase/fructose-2,6-biphosphatase 3                                           | 3,684 | 0,028 |
| <i>LRIG1</i>        | leucine rich repeats and immunoglobulin like domains 1                                          | 2,982 | 0,028 |
| <i>RPS6KA1</i>      | ribosomal protein S6 kinase, polypeptide 1                                                      | 2,341 | 0,029 |
| <i>EFHD1</i>        | EF-hand domain family member D1                                                                 | 2,539 | 0,029 |
| <i>MYCT1</i>        | myc target 1                                                                                    | 2,114 | 0,031 |
| <i>OPTN</i>         | optineurin                                                                                      | 2,061 | 0,031 |
| <i>NDUFAF6</i>      | NADH dehydrogenase (ubiquinone) complex I, assembly factor 6                                    | 2,153 | 0,031 |
| <i>ALG6</i>         | ALG6, alpha-1,3-glucosyltransferase                                                             | 2,552 | 0,031 |
| <i>SLCO2B1</i>      | solute carrier organic anion transporter family, member 2B1                                     | 3,505 | 0,031 |
| <i>DPYSL2</i>       | dihydropyrimidinase-like 2                                                                      | 2,120 | 0,031 |
| <i>BMP2K</i>        | BMP2 inducible kinase                                                                           | 2,439 | 0,031 |
| <i>SLC14A1</i>      | solute carrier family 14, member 1                                                              | 2,971 | 0,032 |
| <i>GJA1</i>         | gap junction protein alpha 1                                                                    | 2,902 | 0,032 |
| <i>STX16-NPEPL1</i> | STX16-NPEPL1 readthrough (NMD candidate)                                                        | 2,014 | 0,033 |
| <i>TOB2</i>         | transducer of ERBB2, 2                                                                          | 2,099 | 0,033 |



|                 |                                                                |       |       |
|-----------------|----------------------------------------------------------------|-------|-------|
| <i>MTIE</i>     | metallothionein 1E                                             | 2,822 | 0,034 |
| <i>CCDC88A</i>  | coiled-coil domain containing 88A                              | 2,007 | 0,035 |
| <i>LIG4</i>     | ligase IV, DNA, ATP-dependent                                  | 2,032 | 0,035 |
| <i>FRYL</i>     | FRY like transcription coactivator                             | 2,305 | 0,037 |
| <i>IL1RL1</i>   | interleukin 1 receptor-like 1                                  | 5,867 | 0,037 |
| <i>SCRG1</i>    | stimulator of chondrogenesis 1                                 | 2,636 | 0,037 |
| <i>MTIL</i>     | metallothionein 1L                                             | 2,136 | 0,038 |
| <i>PROX1</i>    | prospero homeobox 1                                            | 3,831 | 0,038 |
| <i>IL13RA1</i>  | interleukin 13 receptor, alpha 1                               | 2,235 | 0,039 |
| <i>BAZ2B</i>    | bromodomain adjacent to zinc finger domain 2B                  | 2,220 | 0,039 |
| <i>BRICD5</i>   | BRICHOS domain containing 5                                    | 2,190 | 0,039 |
| <i>CLASP2</i>   | cytoplasmic linker associated protein 2                        | 2,201 | 0,041 |
| <i>GRID2</i>    | glutamate receptor, ionotropic, delta 2                        | 2,545 | 0,041 |
| <i>ARAP2</i>    | ArfGAP with RhoGAP domain, ankyrin repeat and PH domain 2      | 2,076 | 0,041 |
| <i>STON2</i>    | stonin 2                                                       | 2,567 | 0,042 |
| <i>ZDHHC9</i>   | zinc finger, DHHC-type containing 9                            | 2,504 | 0,042 |
| <i>SUSD2</i>    | sushi domain containing 2                                      | 2,042 | 0,042 |
| <i>CSNK1E</i>   | casein kinase 1, epsilon                                       | 2,258 | 0,042 |
| <i>SERPINA3</i> | serpin peptidase inhibitor, clade A, member 3                  | 8,344 | 0,043 |
| <i>TRPS1</i>    | trichorhinophalangeal syndrome I                               | 2,442 | 0,043 |
| <i>MAL</i>      | mal, T-cell differentiation protein                            | 2,797 | 0,043 |
| <i>PTTG2</i>    | pituitary tumor-transforming 2                                 | 2,020 | 0,044 |
| <i>ADIRF</i>    | adipogenesis regulatory factor                                 | 3,469 | 0,044 |
| <i>LEAP2</i>    | liver expressed antimicrobial peptide 2                        | 2,549 | 0,044 |
| <i>MT1C</i>     | metallothionein 1C                                             | 2,822 | 0,044 |
| <i>WFS1</i>     | Wolfram syndrome 1 (wolframin)                                 | 2,125 | 0,044 |
| <i>TMPRSS5</i>  | transmembrane protease, serine 5                               | 2,535 | 0,045 |
| <i>MT1X</i>     | metallothionein 1X                                             | 3,766 | 0,045 |
| <i>ALMS1</i>    | Alstrom syndrome protein 1                                     | 2,117 | 0,045 |
| <i>MT1G</i>     | metallothionein 1G                                             | 2,391 | 0,046 |
| <i>MT1B</i>     | metallothionein 1B                                             | 2,624 | 0,046 |
| <i>STOM</i>     | stomatin                                                       | 2,159 | 0,047 |
| <i>ZDHHC11</i>  | zinc finger, DHHC-type containing 11                           | 2,072 | 0,047 |
| <i>MAP3K12</i>  | mitogen-activated protein kinase kinase kinase 12              | 2,044 | 0,047 |
| <i>EFHC2</i>    | EF-hand domain (C-terminal) containing 2                       | 2,218 | 0,047 |
| <i>MS4A7</i>    | membrane-spanning 4-domains, subfamily A, member 7             | 2,194 | 0,047 |
| <i>RGCC</i>     | regulator of cell cycle                                        | 2,359 | 0,048 |
| <i>WIF1</i>     | WNT inhibitory factor 1                                        | 2,453 | 0,048 |
| <i>CHST11</i>   | carbohydrate sulfotransferase 11                               | 2,294 | 0,049 |
| <i>PLLP</i>     | plasmolipin                                                    | 2,161 | 0,049 |
| <i>CD34</i>     | CD34 molecule                                                  | 2,181 | 0,049 |
| <i>HEY2</i>     | hes-related family bHLH transcription factor with YRPW motif 2 | 2,494 | 0,049 |

9

10

**Table 4.** Genes decreased in centenarians vs young individuals in hippocampus

| Gene symbol      | Gene name                                                                                              | Fold Change | p-value |
|------------------|--------------------------------------------------------------------------------------------------------|-------------|---------|
| <i>PANK1</i>     | pantothenate kinase 1                                                                                  | -3,606      | 0,001   |
| <i>ZNF432</i>    | zinc finger protein 432                                                                                | -2,460      | 0,001   |
| <i>FOXP1</i>     | forkhead box P1                                                                                        | -2,842      | 0,002   |
| <i>TP63</i>      | tumor protein p63                                                                                      | -2,083      | 0,002   |
| <i>F11</i>       | coagulation factor XI                                                                                  | -2,823      | 0,003   |
| <i>PNLDC1</i>    | poly(A)-specific ribonuclease (PARN)-like domain containing 1                                          | -2,009      | 0,004   |
| <i>SPTLC3</i>    | serine palmitoyltransferase, long chain base subunit 3                                                 | -6,634      | 0,004   |
| <i>SUFU</i>      | SUFU negative regulator of hedgehog signaling                                                          | -2,025      | 0,005   |
| <i>CDON</i>      | cell adhesion associated, oncogene regulated                                                           | -2,343      | 0,005   |
| <i>NIPAL2</i>    | NIPA-like domain containing 2                                                                          | -2,488      | 0,006   |
| <i>SLC38A6</i>   | solute carrier family 38, member 6                                                                     | -2,415      | 0,006   |
| <i>CCDC36</i>    | coiled-coil domain containing 36                                                                       | -2,167      | 0,007   |
| <i>SPRY3</i>     | sprouty RTK signaling antagonist 3                                                                     | -2,104      | 0,009   |
| <i>SPRY3</i>     | sprouty RTK signaling antagonist 3                                                                     | -2,104      | 0,009   |
| <i>CRY2</i>      | cryptochrome circadian regulator 2                                                                     | -2,277      | 0,009   |
| <i>NARS</i>      | asparaginyl-tRNA synthetase                                                                            | -2,337      | 0,009   |
| <i>SWI5</i>      | SWI5 homologous recombination repair protein                                                           | -2,227      | 0,009   |
| <i>TMEM246</i>   | transmembrane protein 246                                                                              | -2,751      | 0,011   |
| <i>LOXHD1</i>    | lipoxygenase homology domains 1                                                                        | -2,089      | 0,011   |
| <i>OSR1</i>      | odd-skipped related transcription factor 1                                                             | -2,059      | 0,011   |
| <i>SLIT2</i>     | slit guidance ligand 2                                                                                 | -2,304      | 0,011   |
| <i>SERPINF1</i>  | serpin peptidase inhibitor, clade F (alpha-2 antiplasmin, pigment epithelium derived factor), member 1 | -3,020      | 0,012   |
| <i>GREB1</i>     | growth regulation by estrogen in breast cancer 1                                                       | -2,386      | 0,012   |
| <i>PTGDR</i>     | prostaglandin D2 receptor                                                                              | -2,139      | 0,013   |
| <i>ERGIC2</i>    | ERGIC and golgi 2                                                                                      | -2,112      | 0,014   |
| <i>GALNT14</i>   | polypeptide N-acetylgalactosaminyltransferase 14                                                       | -2,413      | 0,014   |
| <i>EPGN</i>      | epithelial mitogen                                                                                     | -2,219      | 0,015   |
| <i>POGZ</i>      | pogo transposable element derived with ZNF domain                                                      | -2,156      | 0,015   |
| <i>TPMT</i>      | thiopurine S-methyltransferase                                                                         | -2,952      | 0,015   |
| <i>SLC5A5</i>    | solute carrier family 5, member 5                                                                      | -2,007      | 0,015   |
| <i>CRYZ</i>      | crystallin zeta                                                                                        | -2,136      | 0,0161  |
| <i>CTSK</i>      | cathepsin K                                                                                            | -2,426      | 0,017   |
| <i>MAP2K6</i>    | mitogen-activated protein kinase kinase 6                                                              | -2,292      | 0,018   |
| <i>HYOU1</i>     | hypoxia up-regulated 1                                                                                 | -2,281      | 0,021   |
| <i>CHRNA6</i>    | cholinergic receptor, nicotinic alpha 6                                                                | -2,333      | 0,021   |
| <i>ARSG</i>      | arylsulfatase G                                                                                        | -2,226      | 0,026   |
| <i>GOLGA6L22</i> | golgin A6 family-like 22                                                                               | -2,042      | 0,027   |
| <i>FKBP4</i>     | FK506 binding protein 4                                                                                | -2,539      | 0,027   |
| <i>NNAT</i>      | neuronatin                                                                                             | -3,885      | 0,028   |
| <i>DIO2</i>      | deiodinase, iodothyronine, type II                                                                     | -2,003      | 0,028   |
| <i>DNAJ1</i>     | DnaJ (Hsp40) homolog, subfamily A, member 1                                                            | -2,242      | 0,028   |
| <i>RNF17</i>     | ring finger protein 17                                                                                 | -2,458      | 0,029   |
| <i>UHRF2</i>     | ubiquitin-like with PHD and ring finger domains 2                                                      | -2,056      | 0,031   |
| <i>ZBTB10</i>    | zinc finger and BTB domain containing 10                                                               | -2,757      | 0,031   |
| <i>EFEMP2</i>    | EGF containing fibulin-like extracellular matrix protein 2                                             | -2,211      | 0,032   |

|                 |                                                                       |        |       |
|-----------------|-----------------------------------------------------------------------|--------|-------|
| <i>HTT</i>      | huntingtin                                                            | -2,304 | 0,033 |
| <i>GPRC5A</i>   | G protein-coupled receptor, class C, group 5, member A                | -2,135 | 0,033 |
| <i>LNK2</i>     | ligand of numb-protein X 2                                            | -2,145 | 0,033 |
| <i>SSTR2</i>    | somatostatin receptor 2                                               | -3,392 | 0,033 |
| <i>DFNA5</i>    | deafness, autosomal dominant 5                                        | -3,103 | 0,035 |
| <i>GALK2</i>    | galactokinase 2                                                       | -2,131 | 0,036 |
| <i>PDK3</i>     | pyruvate dehydrogenase kinase, isozyme 3                              | -2,522 | 0,037 |
| <i>SLC22A6</i>  | solute carrier family 22 (organic anion transporter), member 6        | -2,292 | 0,037 |
| <i>SLC25A30</i> | solute carrier family 25, member 30                                   | -2,068 | 0,037 |
| <i>ULK1</i>     | unc-51 like autophagy activating kinase 1                             | -2,263 | 0,038 |
| <i>LAMA1</i>    | laminin, alpha 1                                                      | -2,158 | 0,038 |
| <i>HSPH1</i>    | heat shock 105kDa/110kDa protein 1                                    | -2,238 | 0,039 |
| <i>EXT1</i>     | exostosin glycosyltransferase 1                                       | -2,383 | 0,041 |
| <i>UAP1</i>     | UDP-N-acetylglucosamine pyrophosphorylase 1                           | -2,181 | 0,041 |
| <i>CD83</i>     | CD83 molecule                                                         | -2,028 | 0,043 |
| <i>TSPAN18</i>  | tetraspanin 18                                                        | -9,200 | 0,043 |
| <i>ANGPT4</i>   | angiopoietin 4                                                        | -2,012 | 0,045 |
| <i>PPM1G</i>    | protein phosphatase, Mg <sup>2+</sup> /Mn <sup>2+</sup> dependent, 1G | -2,233 | 0,046 |
| <i>C9orf72</i>  | chromosome 9 open reading frame 72                                    | -2,258 | 0,046 |
| <i>GOLGA6L6</i> | golgin A6 family-like 6                                               | -2,060 | 0,046 |
| <i>PTGR1</i>    | prostaglandin reductase 1                                             | -2,385 | 0,046 |
| <i>LAMB1</i>    | laminin, beta 1                                                       | -2,192 | 0,047 |
| <i>FAM134A</i>  | family with sequence similarity 134, member A                         | -2,903 | 0,047 |
| <i>TBPL1</i>    | TBP-like 1                                                            | -3,950 | 0,048 |
| <i>MPP6</i>     | membrane protein, palmitoylated 6                                     | -3,956 | 0,048 |
| <i>NREP</i>     | neuronal regeneration related protein                                 | -2,659 | 0,048 |
| <i>GCKR</i>     | glucokinase regulator                                                 | -2,102 | 0,049 |
| <i>KLF5</i>     | Kruppel-like factor 5                                                 | -2,417 | 0,049 |
| <i>ZFPM2</i>    | zinc finger protein, FOG family member 2                              | -3,366 | 0,049 |

13

14
